# Supplementary material for: Increased Consumption of Dairy Foods and Protein during Diet- and Exercise-Induced Weight Loss Promotes Fat Mass Loss and Lean Mass Gain in Overweight and Obese Premenopausal Women
Source: PubMed Central journal article supplement — J Nutr. 2011 Jun 20;141(9):1626–34. doi: 10.3945/jn.111.141028 (PMC3159052; doi:10.3945/jn.111.141028), 2011-06-20
Supplement: supp_jn.111.141028_nut_141028_SF1.pdf [file supp_jn.111.141028_nut_141028_SF1.pdf]

## Online Supporting Material

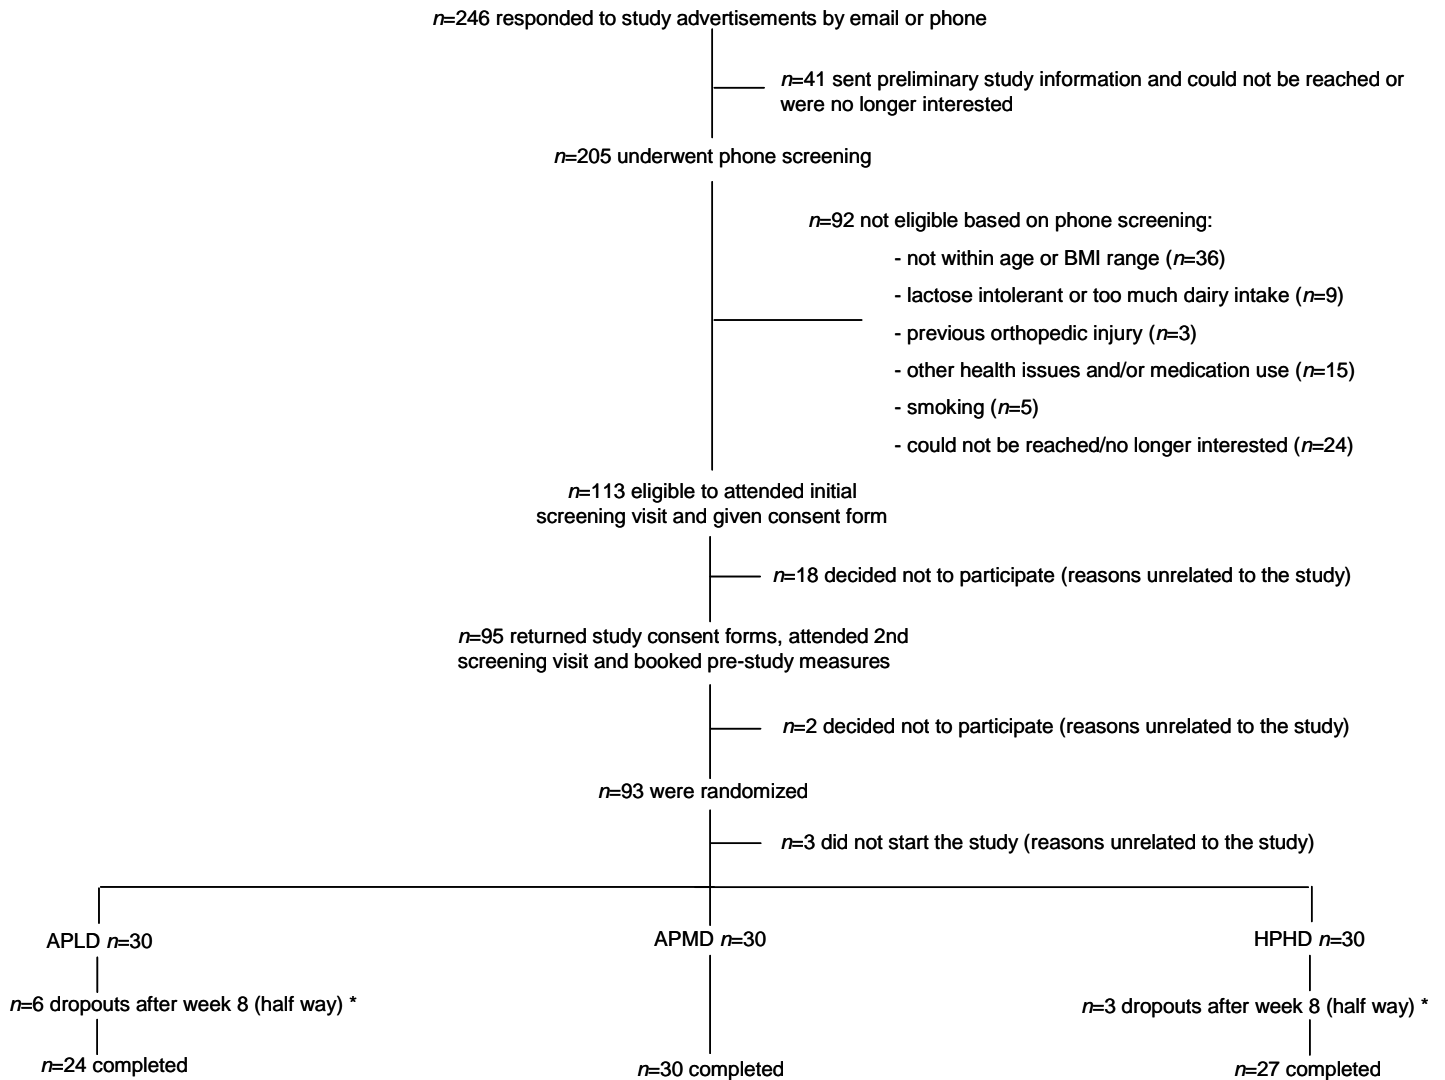

**Supplemental Figure 1.** Participant flow through the I.D.E.A.L. for Women Study. \* Six participants in APLD and three participants in HPHD dropped out for reasons unrelated to the study including: moving houses, working extra shifts, sickness of a relative, and exam time at school.
