# Supplementary material for: Increased Consumption of Dairy Foods and Protein during Diet- and Exercise-Induced Weight Loss Promotes Fat Mass Loss and Lean Mass Gain in Overweight and Obese Premenopausal Women
Source: PubMed Central journal article supplement — J Nutr. 2011 Jun 20;141(9):1626–34. doi: 10.3945/jn.111.141028 (PMC3159052; doi:10.3945/jn.111.141028), 2011-06-20
Supplement: supp_jn.111.141028_nut_141028_ST1.pdf [file supp_jn.111.141028_nut_141028_ST1.pdf]

## Online Supporting Material

**Supplemental Table 1:** Circulating lipids, glucose, insulin, inflammatory markers and calcium in overweight and obese premenopausal women before and after a 16 wk intervention of diet- and exercise-induced weight loss. <sup>1</sup>

| Variable                              | APLD      |                          | APMD      |                        | HPHD      |                         |
|---------------------------------------|-----------|--------------------------|-----------|------------------------|-----------|-------------------------|
|                                       | wk 0      | wk 16                    | wk 0      | wk 16                  | wk 0      | wk 16                   |
| Serum Cholesterol, <i>mmol/L</i>      |           |                          |           |                        |           |                         |
| Total                                 | 4.72±0.15 | 4.39±0.16*               | 4.48±0.11 | 4.39±0.11              | 4.67±0.15 | 4.39±0.13*              |
| LDL                                   | 2.75±0.13 | 2.54±0.12*               | 2.58±0.09 | 2.53±0.09              | 2.77±0.13 | 2.51±0.12*              |
| HDL                                   | 1.40±0.05 | 1.42±0.06                | 1.39±0.05 | 1.35±0.04              | 1.43±0.05 | 1.47±0.06               |
| Serum triglycerides, <i>mmol/L</i>    | 1.10±0.07 | 0.93±0.08* <sup>ab</sup> | 1.11±0.07 | 1.09±0.11 <sup>a</sup> | 1.00±0.07 | 0.81±0.06* <sup>b</sup> |
| Plasma glucose, <i>mmol/L</i>         | 4.9±0.1   | 4.7±0.1                  | 4.9±0.1   | 4.9±0.1                | 4.9±0.1   | 4.9±0.1                 |
| Serum insulin, <i>pmol/L</i>          | 57±7      | 50±5                     | 69±8      | 59±7*                  | 51±6      | 44±6                    |
| Plasma calcium, <i>mmol/L</i>         | 2.41±0.02 | 2.39±0.02                | 2.38±0.02 | 2.40±0.02              | 2.50±0.02 | 2.51±0.02               |
| Serum IL-6, <i>ng/L</i>               | 1.95±0.13 | 1.86±0.20                | 2.08±0.31 | 1.69±0.15*             | 1.80±0.16 | 1.43±0.13               |
| Serum C-reactive protein, <i>mg/L</i> | 9.66±2.25 | 7.19±2.25*               | 6.40±1.37 | 4.25±0.75*             | 7.21±1.83 | 4.88±1.27*              |

<sup>1</sup> Data are presented as mean ± SE; *n*=90 (30 per group). Means at a time with superscripts without a common letter differ, *P*<0.05. \*Different from wk 0, *P*<0.05.
